# Supplementary material
Source: PubMed Central journal article supplement (PMC3076742)

**SUPPLEMENTAL MATERIAL**  
**Consort diagram**

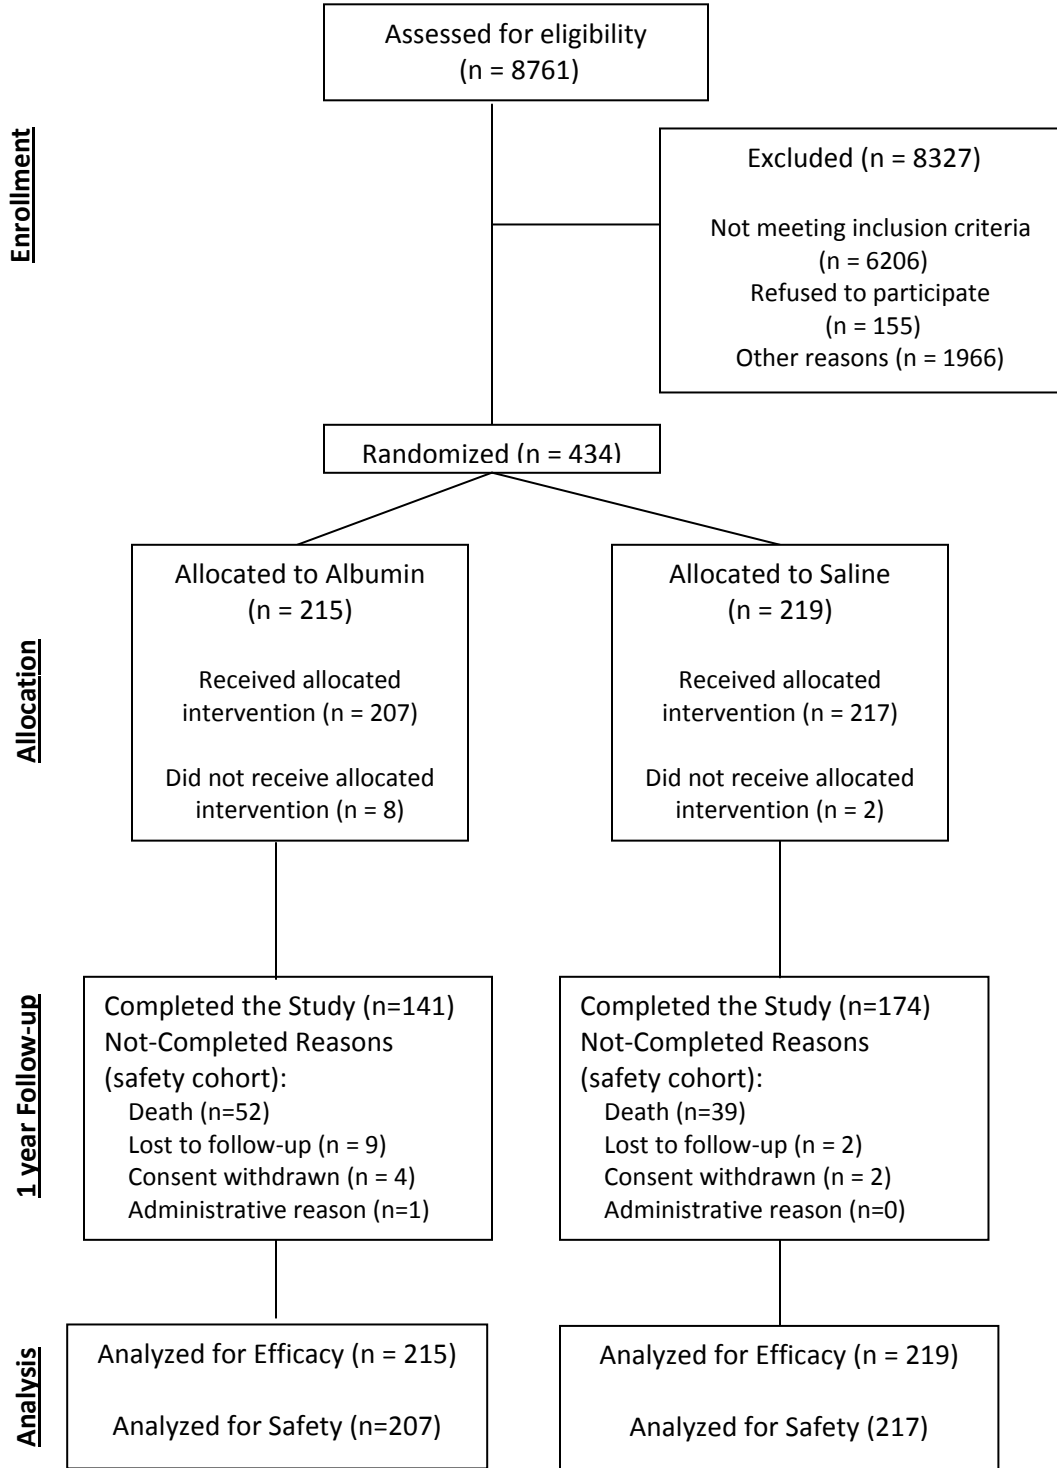

Supplement: NIHMS259893-supplement-1.pdf [file NIHMS259893-supplement-1.pdf]
